# Supplementary material for: Physical Mapping of QTLs for Root Traits in a Population of Recombinant Inbred Lines of Hexaploid Wheat
Source: MDPI journal article supplement (doi:10.3390/ijms241310492), 2023-06-22
Supplement: s1 [file s1]

## Supplementary Information Tables S1–S3.

### Physical mapping of QTLs for root traits in a population of recombinant inbred lines of hexaploid wheat

Xiaoqing Li <sup>1,\*</sup>, Anton P. Wasson <sup>1</sup>, Alexander B. Zwart <sup>1</sup>, Alex Whan <sup>1</sup>, Peter R. Ryan <sup>1</sup>,  
Kerrie Forrest <sup>2</sup>, Matthew Hayden <sup>2,3</sup>, Sabrina Chin <sup>4</sup>, Richard Richards <sup>1</sup> and Emmanuel Delhaize <sup>5</sup>

<sup>1</sup> CSIRO Agriculture and Food, Canberra, ACT 2601, Australia; anton.wasson@csiro.au (A.P.W.); alec.zwart@data61.csiro.au (A.B.Z.); alex.whan@csiro.au (A.W.); peter.ryan@csiro.au (P.R.R.); richard.richards@csiro.au (R.R.)

<sup>2</sup> Agriculture Victoria Research, AgriBio, Centre for AgriBioscience, Bundoora, VIC 3083, Australia; kerrie.forrest@agriculture.vic.gov.au (K.F.); matthew.hayden@agriculture.vic.gov.au (M.H.)

<sup>3</sup> School of Applied Systems Biology, La Trobe University, Bundoora, VIC 3086, Australia

<sup>4</sup> Department of Botany, University of Wisconsin, Madison, WI 53706, USA; schin7@wisc.edu

<sup>5</sup> Australian Plant Phenomics Facility, Research School of Biology, The Australian National University, Canberra, ACT 2601, Australia; manny.delhaize@anu.edu.au

\* Correspondence: xiaoqing.li@csiro.au

**Table S1.** Genetic map of root QTL with a LOD > 3.0. Shown are flanking marker positions in cM, LOD score, additive effect and percent variation contributed by the QTL.

| QTL: name, trait and chromosome   | Left marker             | cM    | Right marker            | cM     | LOD       | Add*   | % var'n |
|-----------------------------------|-------------------------|-------|-------------------------|--------|-----------|--------|---------|
| <b>Root dry weight</b>            |                         |       |                         |        |           |        |         |
| <i>Qrdw-2A</i>                    | wsnp_Ra_c66636_64922359 | 183.8 | RAC875_c66695_1376      | 185.2  | 3.91      | -0.013 | 7.0     |
| <i>Qrdw-2B</i>                    | Excalibur_c30207_261    | 157.0 | Excalibur_c34380_275    | 159.18 | 5.29      | 0.017  | 10.6    |
| <i>Qrdw-4A</i>                    | Excalibur_c539_1253     | 138.9 | wsnp_Ku_c1205_2398925   | 141.1  | 3.54      | 0.013  | 6.4     |
| <b>Root diameter</b>              |                         |       |                         |        |           |        |         |
| <i>Qrd-4A</i>                     | BS00109722_51           | 104.2 | wsnp_Ex_c1373_2628597   | 106.1  | 4.08      | 0.003  | 5.9     |
| <i>Qrd-4B1</i>                    | RAC875_c56905_265       | 85.3  | BS00063035_51           | 87.2   | 3.10      | 0.004  | 7.4     |
| <i>Qrd-4B2</i>                    | IAAV9209                | 135.8 | tplb0036n21_1765        | 137.3  | 6.82      | -0.006 | 15.6    |
| <i>Qrd-5A</i>                     | wsnp_Ex_c57094_58953404 | 24.8  | RAC875_c30001_200       | 27.4   | 3.92      | -0.003 | 4.9     |
| <i>Qrd-5D</i>                     | RAC875_c51455_182       | 32.3  | BS00021901_51           | 33.7   | 11.4<br>4 | -0.005 | 13.8    |
| <i>Qrd-6A</i>                     | Tdurum_contig30082_197  | 106.4 | Excalibur_c49419_202    | 108.2  | 5.90      | -0.004 | 7.6     |
| <i>Qrd-7A</i>                     | IAAV1372                | 184.7 | BS00073170_51           | 186.2  | 5.26      | -0.004 | 7.5     |
| <b>Total nodal root number</b>    |                         |       |                         |        |           |        |         |
| <i>Qnrn-2B</i>                    | RAC875_c102981_396      | 141.6 | Kukri_c691_504          | 143.2  | 3.16      | 0.858  | 6.0     |
| <i>Qnrn-4B</i>                    | Tdurum_contig33737_157  | 77.8  | Tdurum_contig30537_228  | 79.6   | 4.28      | -1.014 | 8.2     |
| <i>Qnrn-6B</i>                    | JD_c8399_626            | 69.5  | Tdurum_contig55201_928  | 81.7   | 3.69      | -0.979 | 6.3     |
| <i>Qnrn-7A1</i>                   | D_GDEEGVY01CQJ66_272    | 165.2 | Tdurum_contig63598_188  | 167.2  | 3.13      | -0.902 | 6.5     |
| <i>Qnrn-7A2</i>                   | Excalibur_c12500_116    | 123.6 | Tdurum_contig82510_574  | 126.9  | 6.28      | -1.269 | 12.2    |
| <b>Nodal root number per stem</b> |                         |       |                         |        |           |        |         |
| <i>Qnrns-2B</i>                   | TA006140-0798           | 181.8 | Ku_c66850_510           | 184.5  | 3.86      | 0.088  | 6.0     |
| <i>Qnrns-4B</i>                   | Jagger_c1432_289        | 129.7 | Tdurum_contig11735_1294 | 131.6  | 4.52      | -0.096 | 7.2     |
| <i>Qnrns-6D</i>                   | RFL_Contig6056_604      | 2.9   | CAP7_c2537_344          | 4.6    | 3.48      | 0.080  | 5.1     |
| <i>Qnrns-7A</i>                   | Excalibur_c12500_116    | 123.6 | Tdurum_contig82510_574  | 126.9  | 13.1<br>4 | -0.167 | 20.2    |
| <i>Qnrns-7B</i>                   | BS00055861_51           | 133.9 | RAC875_c79695_343       | 135.9  | 3.01      | 0.078  | 4.8     |
| <b>Root angle</b>                 |                         |       |                         |        |           |        |         |
| <i>Qra-4B</i>                     | Jagger_c1432_289        | 129.7 | Tdurum_contig11735_1294 | 131.6  | 5.01      | -0.026 | 24.1    |
| <b>Specific root length</b>       |                         |       |                         |        |           |        |         |
| <i>Qsrl-4B1</i>                   | tplb0036n21_1765        | 137.3 | Tdurum_contig64848_104  | 138.6  | 5.50      | 0.017  | 19.6    |
| <i>Qsrl-6A</i>                    | CAP12_c2701_221         | 135.2 | Tdurum_contig28847_322  | 138.1  | 4.62      | 0.012  | 9.5     |
| <b>Root to shoot ratio</b>        |                         |       |                         |        |           |        |         |
| <i>Qrsr-3A</i>                    | IACX333                 | 170.2 | BS00050109_51           | 172.0  | 5.92      | -0.008 | 15      |
| <b>Shoot dry weight</b>           |                         |       |                         |        |           |        |         |
| <i>Qsdw-2A</i>                    | BobWhite_c16248_382     | 209.1 | Kukri_c18104_1416       | 210.7  | 3.32      | -0.04  | 5.5     |
| <i>Qsdw-3B</i>                    | RAC875_c48556_278       | 183.6 | RAC875_c28912_306       | 185.4  | 6.51      | -0.059 | 11.2    |
| <i>Qsdw-4A</i>                    | wsnp_Ex_c7011_12080274  | 94.0  | IACX1427                | 95.4   | 3.11      | 0.035  | 5.9     |

\*Positive alleles contributed by Spica and negative alleles contributed by Maringa.

**Table S2.** Genetic map of root QTL with a LOD < 3.0. Shown are flanking marker positions in cM, LOD score, additive effect and percent variation contributed by the QTL.

| QTL: name, trait and chromosome   | Left marker                  | cM    | Right marker             | cM    | LOD   | Add*   | % var'n |
|-----------------------------------|------------------------------|-------|--------------------------|-------|-------|--------|---------|
| <b>Root dry weight</b>            |                              |       |                          |       |       |        |         |
| <i>Qrdw-1A</i>                    | RAC875_c1599_342             | 260.9 | BS00022824_51            | 266.1 | 2.722 | -0.011 | 4.5     |
| <i>Qrdw-1B</i>                    | Excalibur_rep_c107678_98     | 287.8 | CAP7_c3847_204           | 290.1 | 1.654 | -0.008 | 3.0     |
| <i>Qrdw-4B</i>                    | TA004394-0527                | 126.2 | BS00011085_51            | 128.2 | 1.613 | 0.009  | 3.0     |
| <i>Qrdw-5A</i>                    | RAC875_rep_c76193_513        | 125.9 | BS00088851_51            | 128.0 | 2.764 | 0.011  | 4.8     |
| <i>Qrdw-5B</i>                    | BS00021993_51                | 0.0   | Tdurum_contig28552_211   | 8.7   | 1.967 | 0.010  | 3.3     |
| <i>Qrdw-6B</i>                    | Excalibur_c2328_1207         | 165.8 | BobWhite_c42198_254      | 166.6 | 1.378 | -0.008 | 2.6     |
| <i>Qrdw-6D1</i>                   | wsnp_Ex_c14691_227631_71     | 27.4  | BobWhite_c34996_280      | 28.3  | 2.198 | 0.009  | 3.6     |
| <i>Qrdw-6D2</i>                   | CAP7_c2537_344               | 114.8 | RFL_Contig6056_604       | 116.5 | 1.36  | 0.007  | 2.2     |
| <i>Qrdw-7A</i>                    | RAC875_c35723_106            | 110.7 | Tdurum_contig8615_370    | 112.6 | 2.144 | -0.010 | 3.9     |
| <b>Root diameter</b>              |                              |       |                          |       |       |        |         |
| <i>Qrd-3A</i>                     | wsnp_Ex_rep_c66685_650_03254 | 178.8 | GENE-4795_75             | 180.2 | 2.70  | -0.003 | 3.5     |
| <i>Qrd-5B</i>                     | BS00068200_51                | 229.9 | wsnp_Ra_c24619_3416810_4 | 234.7 | 2.93  | 0.003  | 3.7     |
| <i>Qrd-7B</i>                     | RAC875_rep_c73965_114        | 116.8 | Excalibur_c13444_235     | 118.8 | 2.00  | -0.002 | 2.6     |
| <b>Total nodal root number</b>    |                              |       |                          |       |       |        |         |
| <i>Qnrn-3B</i>                    | wsnp_JD_c10233_109365_35     | 212.6 | BS00049639_51            | 214.6 | 2.514 | -0.763 | 4.8     |
| <b>Nodal root number per stem</b> |                              |       |                          |       |       |        |         |
| <i>Qnrns-2A1</i>                  | RAC875_rep_c83950_222        | 16.9  | Tdurum_contig66353_358   | 18.5  | 2.459 | -0.067 | 3.6     |
| <i>Qnrns-2A2</i>                  | Kukri_rep_c109732_72         | 215.8 | Excalibur_c12980_2621    | 217.2 | 2.693 | 0.070  | 3.9     |
| <i>Qnrns-3A</i>                   | BS00050109_51                | 112.6 | IACX333                  | 114.4 | 2.348 | -0.066 | 3.6     |
| <b>Root angle</b>                 |                              |       |                          |       |       |        |         |
| <i>Qra-1A</i>                     | GENE-0235_245                | 104.4 | D_contig04348_649        | 107.5 | 2.329 | -0.017 | 10.9    |
| <i>Qra-3A</i>                     | Kukri_rep_c106620_208        | 50.7  | wsnp_CAP8_c6939_324253_0 | 51.6  | 2.558 | -0.017 | 11.1    |
| <i>Qra-5B</i>                     | RAC875_c31261_367            | 101.0 | wsnp_Ku_c11138_1825246_1 | 101.6 | 2.248 | -0.016 | 10.2    |
| <i>Qra-6B</i>                     | CAP11_c816_470               | 46.7  | Excalibur_c13206_108     | 50.5  | 2.292 | -0.017 | 10.1    |
| <b>Specific root length</b>       |                              |       |                          |       |       |        |         |
| <i>Qsrl-3B</i>                    | Kukri_c43588_354             | 62.9  | Tdurum_contig45817_193   | 64.7  | 1.616 | -0.007 | 3.2     |
| <i>Qsrl-4A</i>                    | wsnp_Ex_c1373_2628597        | 195.4 | BS00109722_51            | 197.3 | 1.803 | -0.007 | 3.8     |
| <i>Qsrl-4B2</i>                   | Excalibur_c56787_95          | 152.4 | BS00063035_51            | 154.7 | 1.714 | -0.009 | 6.5     |
| <i>Qsrl-5D</i>                    | Kukri_c13045_302             | 203.0 | BS00021901_51            | 204.8 | 2.255 | 0.008  | 4.4     |
| <i>Qsrl-7A</i>                    | BobWhite_c5396_296           | 203.5 | GENE-4508_109            | 205.5 | 2.628 | 0.009  | 5.7     |
| <b>Root to shoot ratio</b>        |                              |       |                          |       |       |        |         |
| <i>Qrsr-2A</i>                    | BS00081195_51                | 104.4 | BS00012320_51            | 109.4 | 1.886 | -0.005 | 5.0     |
| <i>Qrsr-3B</i>                    | RFL_Contig4667_3535          | 187.8 | BS00022051_51            | 189.1 | 2.157 | 0.005  | 5.8     |
| <i>Qrsr-3D</i>                    | Kukri_c908_584               | 183.2 | BobWhite_c27145_731      | 184.3 | 2.197 | 0.005  | 5.4     |
| <i>Qrsr-7B</i>                    | Kukri_c9405_379              | 128.4 | Tdurum_contig74753_946   | 130.8 | 2.73  | 0.006  | 6.9     |
| <i>Qrsr-7D</i>                    | D_GBQ4KXB02FR7XF_153         | 0.0   | RAC875_c59686_292        | 1.3   | 2.824 | 0.005  | 6.5     |
| <b>Shoot dry weight</b>           |                              |       |                          |       |       |        |         |
| <i>Qsdw-6D</i>                    | RFL_Contig6056_604           | 116.5 | wsnp_BE445201D_Ta_1_1    | 119.4 | 1.87  | 0.029  | 2.9     |
| <b>Tiller number</b>              |                              |       |                          |       |       |        |         |
| <i>Qtn-3A</i>                     | IACX333                      | 114.4 | BS00084158_51            | 117.3 | 2.896 | 0.338  | 6.9     |
| <i>Qtn-4B</i>                     | wsnp_Ex_c6739_1164640_7      | 200.5 | tp1b0024a16_411          | 203.1 | 1.915 | -0.266 | 4.5     |
| <i>Qtn-6A1</i>                    | Excalibur_c96749_512         | 22.0  | Kukri_c40994_61          | 22.4  | 2.957 | -0.331 | 6.8     |
| <i>Qtn-6A2</i>                    | Excalibur_c49419_202         | 145.6 | Tdurum_contig30082_197   | 147.4 | 1.941 | 0.267  | 4.5     |

\*Positive alleles contributed by Spica and negative alleles contributed by Maringa.

**Table S3.** List of wheat root genes and the wheat homologs of genes associated with root development and architecture cloned from other monocotyledons. Gene names used the same nomenclature as original references and are preceded with *Ta* to indicate *Triticum aestivum*, followed by designation of the particular homeolog (-*A*, -*B* or -*D*). Gene names and physical locations are provided for the IWGSC v1.0 genome. A brief description of the trait, reference, and species from which the genes were cloned are also provided.

| Gene name            | Trait                                         | Species             | Reference | IWGSC v 1.0 gene name     | Physical location          |
|----------------------|-----------------------------------------------|---------------------|-----------|---------------------------|----------------------------|
| <i>TaMOR-A*</i>      | Root architecture                             | Wheat               | [36]      | <i>TraesCS4A02G415400</i> | chr4A: 685380302-685381598 |
| <i>TaMOR-B</i>       |                                               |                     |           | <i>TraesCS4B02G316200</i> | chr4B: 605691920-605693239 |
| <i>TaMOR-D</i>       |                                               |                     |           | <i>TraesCS4D02G312800</i> | chr4D: 478997945-478999338 |
| <i>TaANDRO-A</i>     | Deeper rooting                                | Wheat               | [37]      | <i>TraesCS5A02G213300</i> | chr5A: 428994186-428997632 |
| <i>TaBNDRO-B</i>     |                                               |                     |           | <i>TraesCS5B02G210500</i> | chr5B: 381041995-381044714 |
| <i>TaDNDRO-D</i>     |                                               |                     |           | <i>TraesCS5D02G218700</i> | chr5D: 327631371-327634216 |
| <i>TaARF4-A</i>      | Root and shoot traits- auxin response factors | Wheat               | [38]      | <i>TraesCS3A02G442000</i> | chr3A: 684040773-684045606 |
| <i>TaARF4-B</i>      |                                               |                     |           | <i>TraesCS3B02G475800</i> | chr3B: 724737433-724742425 |
| <i>TaARF4-D</i>      |                                               |                     |           | <i>TraesCS3D02G434700</i> | chr3D: 547298032-547302973 |
| <i>TaSERK-A</i>      | Root and shoot traits                         | Wheat               | [39]      | <i>TraesCS2A02G343100</i> | chr2A: 580017609-580023752 |
| <i>TaSERK-B</i>      |                                               |                     |           | <i>TraesCS2B02G340700</i> | chr2B: 486190984-486197028 |
| <i>TaSERK-D</i>      |                                               |                     |           | <i>TraesCS2D02G321400</i> | chr2D: 412833158-412839366 |
| <i>TaBRI1-A</i>      | Interacts with <i>TaSERK</i>                  | Wheat               | [40]      | <i>TraesCS3A02G245000</i> | chr3A: 458678631-458682691 |
| <i>TaBRI1-B</i>      |                                               |                     |           | <i>TraesCS3B02G275000</i> | chr3B: 443803664-443807278 |
| <i>TaBRI1-D</i>      |                                               |                     |           | <i>TraesCS3D02G246500</i> | chr3D: 344337925-344342369 |
| <i>TaVP1-A</i>       | Vacuolar-PPase                                | Wheat               | [41]      | <i>TraesCS7A02G141300</i> | chr7A: 92888389-92893250   |
| <i>TaVP1-B</i>       |                                               |                     |           | <i>TraesCS7B02G042600</i> | chr7B: 42027289-42032517   |
| <i>TaVP1-D</i>       |                                               |                     |           | <i>TraesCS7D02G142600</i> | chr7D: 90848363-90854069   |
| <i>TaVRN-A1</i>      | Root system architecture                      | Wheat               | [18]      | <i>TraesCS5A02G391700</i> | chr5A: 587411454-587423416 |
| <i>TaVRN-B1</i>      |                                               |                     |           | <i>TraesCS5B02G396600</i> | chr5B: 573802883-573816070 |
| <i>TaVRN-D1</i>      |                                               |                     |           | <i>TraesCS5D02G401500</i> | chr5D: 467176609-467184508 |
| <i>TaPSTOL</i>       | Root biomass                                  | Wheat               | [42]      | Not annotated             | chr5A: 41374604-41378275   |
| <b>Other species</b> |                                               |                     |           |                           |                            |
| <i>TaCRL5-A</i>      | Crown roots                                   | Rice <i>CRL5</i>    | [17]      | <i>TraesCS2A02G267600</i> | chr2A: 428908059-428911931 |
| <i>TaCRL5-B</i>      |                                               |                     |           | <i>TraesCS2B02G268100</i> | chr2B: 361422652-361426297 |
| <i>TaCRL5-D</i>      |                                               |                     |           | <i>TraesCS2D02G256600</i> | chr2D: 311715447-311719061 |
| <i>TaEXP10-A</i>     | Root cell elongation                          | Rice <i>OsEXP10</i> | [19]      | <i>TraesCS2A02G393700</i> | chr2A: 643439927-643444151 |
| <i>TaEXP10-B</i>     |                                               |                     |           | <i>TraesCS2B02G411700</i> | chr2B: 585891499-585895732 |
| <i>TaEXP10-D</i>     |                                               |                     |           | <i>TraesCS2D02G391600</i> | chr2D: 498768162-498772341 |
| <i>TaSNAC1-A</i>     | Root size                                     | Rice <i>SNAC1</i>   | [43]      | <i>TraesCS5A02G468300</i> | chr5A: 645726140-645727775 |
| <i>TaSNAC1-B</i>     |                                               |                     |           | <i>TraesCS5B02G480900</i> | chr5B: 653432387-653434033 |
| <i>TaSNAC1-D</i>     |                                               |                     |           | <i>TraesCS5D02G481200</i> | chr5D: 519277079-519278774 |
| <i>TaSOR1-A</i>      | Root ethylene responses                       | Rice <i>SOR1</i>    | [44]      | <i>TraesCS2A02G045100</i> | chr2A: 17738033-17741923   |
| <i>TaSOR1-B</i>      |                                               |                     |           | <i>TraesCS2B02G057300</i> | chr2B: 27895909-27899621   |
| <i>TaSOR1-D</i>      |                                               |                     |           | <i>TraesCS2D02G043700</i> | chr2D: 15730614-15734542   |
| <i>TaRUM1-A</i>      | Root initiation                               | Maize <i>RUM1</i>   | [45]      | <i>TraesCS3A02G270000</i> | chr3A: 496704577-496707472 |
| <i>TaRUM1-B</i>      |                                               |                     |           | <i>TraesCS3B02G303900</i> | chr3B: 487906086-487911438 |
| <i>TaRUM1-D</i>      |                                               |                     |           | <i>TraesCS3D02G269700</i> | chr3D: 374205888-374211351 |
| <i>TaPIN1-A</i>      | Root emergence and tillering                  | Rice <i>OsPIN1</i>  | [46]      | <i>TraesCS4A02G188100</i> | chr4A: 466938697-466941682 |
| <i>TaPIN1-B</i>      |                                               |                     |           | <i>TraesCS4B02G130100</i> | chr4B: 170926810-170929710 |
| <i>TaPIN1-D</i>      |                                               |                     |           | <i>TraesCS4D02G125300</i> | chr4D: 109469533-109472292 |

|                      |                          |                       |      |                           |                            |
|----------------------|--------------------------|-----------------------|------|---------------------------|----------------------------|
| <i>TaWOX11-A</i>     | Crown root development   | Rice <i>WOX11</i>     | [47] | <i>TraesCS2A02G100700</i> | chr2A: 53782606-53785288   |
| <i>TaWOX11-B</i>     |                          |                       |      | <i>TraesCS2B02G117900</i> | chr2B: 81755546-81758516   |
| <i>TaWOX11-D</i>     |                          |                       |      | <i>TraesCS2D02G100200</i> | chr2D: 52227203-52229885   |
| <i>TaGNA1-A</i>      | Root cell shape          | Rice <i>OsGNA1</i>    | [48] | <i>TraesCS5A02G264900</i> | chr5A: 476850991-476855275 |
| <i>TaGNA1-B</i>      |                          |                       |      | <i>TraesCS5B02G264500</i> | chr5B: 448600463-448601077 |
| <i>TaGNA1-D</i>      |                          |                       |      | <i>TraesCS5D02G272900</i> | chr5D: 375745767-375748324 |
| <i>TaSPR1-A</i>      | Short postembryonic root | Rice <i>OsSPR1</i>    | [49] | <i>TraesCS3A02G397500</i> | chr3A: 644803705-644811301 |
| <i>TaSPR1-B</i>      |                          |                       |      | <i>TraesCS3B02G429400</i> | chr3B: 668069692-668076933 |
| <i>TaSPR1-D</i>      |                          |                       |      | <i>TraesCS3D02G391300</i> | chr3D: 506172242-506178602 |
| <i>TaCOW1-A</i>      | Root to shoot ratio      | Rice <i>OsCOW1</i>    | [50] | <i>TraesCS4A02G027500</i> | chr4A: 19447812-19450783   |
| <i>TaCOW1-B</i>      |                          |                       |      | <i>TraesCS4B02G278300</i> | chr4B: 560663067-560665760 |
| <i>TaCOW1-D</i>      |                          |                       |      | <i>TraesCS4D02G276600</i> | chr4D: 447910002-447913028 |
| <i>TaWAK1-A1</i>     | Root growth              | Barley <i>HvWAK1</i>  | [51] | <i>TraesCS4A02G499928</i> | chr4A: 744536044-744539773 |
| <i>TaWAK1-A2</i>     |                          |                       |      | <i>TraesCS7A02G000100</i> | chr7A: 238043-241215       |
| <i>TaHDAC1-A</i>     | Lateral root formation   | Rice <i>OsHDAC1</i>   | [52] | <i>TraesCS7A02G365600</i> | chr7A: 539543850-539554190 |
| <i>TaHDAC1-B</i>     |                          |                       |      | <i>TraesCS7B02G261800</i> | chr7B: 482237779-482248552 |
| <i>TaHDAC1-D</i>     |                          |                       |      | <i>TraesCS7D02G356800</i> | chr7D: 459923113-459936250 |
| <i>TaGSK2-A</i>      | Lateral root formation   | Rice <i>OsGSK2</i>    | [52] | <i>TraesCS3A02G136500</i> | chr3A: 114041077-114045106 |
| <i>TaGSK2-D</i>      |                          |                       |      | <i>TraesCS3D02G137200</i> | chr3D: 95945752-95950119   |
| <i>TaBZR1-A</i>      | Lateral root formation   | Rice <i>OsBZR1</i>    | [52] | <i>TraesCS2A02G187800</i> | chr2A: 150123158-150124982 |
| <i>TaBZR1-B</i>      |                          |                       |      | <i>TraesCS2B02G219300</i> | chr2B: 209436541-209438293 |
| <i>TaBZR1-D</i>      |                          |                       |      | <i>TraesCS2D02G199900</i> | chr2D: 151325675-151327278 |
| <i>TaCRD1-A</i>      | Crown root development   | Rice <i>CRD1</i>      | [53] | <i>TraesCS3A02G199400</i> | chr3A: 325281188-325311105 |
| <i>TaCRD1-B</i>      |                          |                       |      | <i>TraesCS3B02G229100</i> | chr3B: 335836563-335873333 |
| <i>TaCRD1-D</i>      |                          |                       |      | <i>TraesCS3D02G205700</i> | chr3D: 264696256-264720565 |
| <i>TaEGT1-A</i>      | Root angle               | Barley <i>EGT1</i>    | [54] | <i>TraesCS6A02G272800</i> | chr6A: 499397353-499400701 |
| <i>TaEGT1-B</i>      |                          |                       |      | <i>TraesCS6B02G300200</i> | chr6B: 538363931-538367345 |
| <i>TaEGT1-D</i>      |                          |                       |      | <i>TraesCS6D02G252800</i> | chr6D: 357002985-357006388 |
| <i>TaEGT2-A</i>      | Root angle               | Barley <i>EGT2</i>    | [20] | <i>TraesCS5A02G102000</i> | chr5A: 151732800-151736140 |
| <i>TaEGT2-B</i>      |                          |                       |      | <i>TraesCS5B02G164200</i> | chr5B: 143293893-143296491 |
| <i>TaEGT2-D</i>      |                          |                       |      | <i>TraesCS5D02G171500</i> | chr5D: 131504758-131508027 |
| <i>TaLAA11-A</i>     | Lateral root growth      | Rice <i>OsLAA11</i>   | [55] | <i>TraesCS5A02G378300</i> | chr5A: 575657011-575659289 |
| <i>TaLAA11-B</i>     |                          |                       |      | <i>TraesCS5B02G381900</i> | chr5B: 559990916-559992903 |
| <i>TaLAA11-D</i>     |                          |                       |      | <i>TraesCS5D02G388300</i> | chr5D: 457775681-457777965 |
| <i>TaLAA13-A</i>     | Lateral root growth      | Rice <i>OsLAA13**</i> | [56] | <i>TraesCS5A02G382600</i> | chr5A: 580464947-580467685 |
| <i>TaLAA13-B</i>     |                          |                       |      | <i>TraesCS5B02G386800</i> | chr5B: 565928821-565931697 |
| <i>TaLAA13-D</i>     |                          |                       |      | <i>TraesCS5D02G392000</i> | chr5D: 460393490-460396369 |
| <i>TaLAA9-A</i>      | Gravitropic response     | Rice <i>OsLAA9</i>    | [57] | <i>TraesCS6A02G373300</i> | chr6A: 596739621-596740759 |
| <i>TaLAA9-B</i>      |                          |                       |      | <i>TraesCS6B02G411000</i> | chr6B: 685017015-685018041 |
| <i>TaLAA9-D</i>      |                          |                       |      | <i>TraesCS6D02G357500</i> | chr6D: 451082161-451083072 |
| <i>TaLAA15a-A***</i> | Gravitropic response     | Rice <i>OsLAA15</i>   | [16] | <i>TraesCS7A02G371500</i> | chr7A: 545472957-545474340 |
| <i>TaLAA15a-B***</i> |                          |                       |      | <i>TraesCS7B02G256100</i> | chr7B: 474642958-474643848 |
| <i>TaLAA15a-D***</i> |                          |                       |      | <i>TraesCS7D02G351400</i> | chr7D: 452153857-452154744 |
| <i>TaLAA3-A</i>      | Gravitropic response     | Rice <i>OsLAA3</i>    | [58] | <i>TraesCS5A02G058700</i> | chr5A: 57562924-57564218   |
| <i>TaLAA3-B</i>      |                          |                       |      | <i>TraesCS5B02G058800</i> | chr5B: 64418744-64420036   |
| <i>TaLAA3-D</i>      |                          |                       |      | <i>TraesCS5D02G069200</i> | chr5D: 66667985-66669320   |
| <i>TaPIN2-A</i>      | Root angle               | Rice <i>OsPIN2</i>    | [59] | <i>TraesCS7A02G492400</i> | chr7A: 681011336-681015619 |
| <i>TaPIN2-B</i>      |                          |                       |      | <i>TraesCS7B02G398100</i> | chr7B: 664106649-664110679 |
| <i>TaPIN2-D</i>      |                          |                       |      | <i>TraesCS7D02G478800</i> | chr7D: 589512605-589516322 |
| <i>TaCYP2-A</i>      | Lateral root development | Rice <i>OsCYP2</i>    | [60] | <i>TraesCS6A02G068900</i> | chr6A: 37407147-37408119   |

|                   |                        |                          |      |                           |                            |
|-------------------|------------------------|--------------------------|------|---------------------------|----------------------------|
| <i>TaCYP2-B</i>   |                        |                          |      | <i>TraesCS6B02G093100</i> | chr6B: 68922518-68923420   |
| <i>TaCYP2-D</i>   |                        |                          |      | <i>TraesCS6D02G066700</i> | chr6D: 32693962-32694930   |
| <i>TaRSA3.2-A</i> | Root angle             | Maize<br><i>ZmRSA3.2</i> | [61] | <i>TraesCS3A02G397900</i> | chr3A: 645129450-645133585 |
| <i>TaRSA3.2-B</i> |                        |                          |      | <i>TraesCS3B02G429900</i> | chr3B: 669424620-669428960 |
| <i>TaRSA3.2-D</i> |                        |                          |      | <i>TraesCS3D02G391800</i> | chr3D: 507026845-507030741 |
| <i>TaCBLI-A</i>   | Root angle             | Maize<br><i>CBLI</i>     | [62] | <i>TraesCS5A02G377900</i> | chr5A: 575594327-575595945 |
| <i>TaCBLI-B</i>   |                        |                          |      | <i>TraesCS5B02G381500</i> | chr5B: 559763470-559765063 |
| <i>TaCBLI-D</i>   |                        |                          |      | <i>TraesCS5D02G387900</i> | chr5D: 457663678-457665461 |
| <i>TaBIGE-A</i>   | Seminal root<br>number | Maize<br><i>BIGE</i>     | [63] | <i>TraesCS4A02G350200</i> | chr4A: 626439275-626443664 |
| <i>TaBIGE-B</i>   |                        |                          |      | <i>TraesCS5B02G522900</i> | chr5B: 684227667-684231381 |
| <i>TaBIGE-D</i>   |                        |                          |      | <i>TraesCS5D02G521600</i> | chr5D: 542589766-542592882 |

\* The *TaMOR* genes of wheat are homologous to the *CRL1* and *RTCS* genes originally identified in rice and maize [64].

\*\* The recently cloned gene *ZmRSA3.1* from maize that controls root angle is a homologue of *OsIAA13* [61].

\*\*\* A *TaIAA15* gene was previously described as controlling shoot architecture [65]. To differentiate the wheat homologs of *OsIAA15* from *TaIAA15* we included the suffix “a” after 15 in the gene name.

#### Supplementary References

16. Yan DW, Wang J, Yuan TT, Hong LW, Gao X, Lu YT (2013) Perturbation of auxin homeostasis by overexpression of wild-type *IAA15* results in impaired stem cell differentiation and gravitropism in roots. PLoS One 8:e58103. doi: 10.1371/journal.pone.0058103
17. Kitomi Y, Ito H, Hobo T, Aya K, Kitano H, Inukai Y (2011) The auxin responsive AP2/ERF transcription factor *CROWN ROOTLESS5* is involved in crown root initiation in rice through the induction of *OsRR1*, a type-A response regulator of cytokinin signaling. Plant J 67:472-484. doi: 10.1111/j.1365-3113.2011.04610.x
18. Voss-Fels KP, Robinson H, Mudge SR, Richard C, Newman S, Wittkop B, Stahl A, Friedt W, Frisch M, Gabur I, Miller-Cooper A, Campbell BC, Kelly A, Fox G, Christopher J, Christopher M, Chenu K, Franckowiak J, Mace ES, Borrell AK, Eagles H, Jordan DR, Botella JR, Hammer G, Godwin ID, Trevaskis B, Snowdon RJ, Hickey LT (2018) *VERNALIZATION1* modulates root system architecture in wheat and barley. Mol Plant 11:226-229. doi: 10.1016/j.molp.2017.10.005
19. Che J, Yamaji N, Shen RF, Ma JF (2016) An Al-inducible expansin gene, *OsEXPA10* is involved in root cell elongation of rice. Plant J 88:132-142. doi: 10.1111/tpj.13237
20. Kirschner GK, Rosignoli S, Guo L, Vardanega I, Imani J, Altmuller J, Milner SG, Balzano R, Nagel KA, Pflugfelder D, Forestan C, Bovina R, Koller R, Stocker TG, Mascher M, Simmonds J, Uauy C, Schoof H, Tuberosa R, Salvi S, Hochholdinger F (2021) *ENHANCED GRAVITROPISM 2* encodes a STERILE ALPHA MOTIF-containing protein that controls root growth angle in barley and wheat. Proc Natl Acad Sci USA 118:e2101526118. doi: 10.1073/pnas.2101526118
36. Li C, Wang J, Li L, Li J, Zhuang M, Li B, Li Q, Huang J, Du Y, Wang J, Fan Z, Mao X, Jing R (2022a) *TaMOR* is essential for root initiation and improvement of root system architecture in wheat. Plant Biotechnol J 20:862-875. doi: 10.1111/pbi.13765
37. Ashraf A, Rehman OU, Muzammil S, Leon J, Naz AA, Rasool F, Ali GM, Zafar Y, Khan MR (2019) Evolution of *Deeper Rooting 1-like* homoeologs in wheat entails the C-

- terminus mutations as well as gain and loss of auxin response elements. PLoS One 14:e0214145. doi: 10.1371/journal.pone.0214145
38. Wang J, Wang R, Mao X, Li L, Chang X, Zhang X, Jing R (2019) *TaARF4* genes are linked to root growth and plant height in wheat. Ann Bot 124:903-915. doi: 10.1093/aob/mcy218
  39. Singh A, Khurana P (2017) Ectopic expression of *Triticum aestivum* *SERK* genes (*TaSERKs*) control plant growth and development in *Arabidopsis*. Sci Rep 7:12368. doi: 10.1038/s41598-017-10038-1
  40. Singh A, Breja P, Khurana JP, Khurana P (2016) Wheat *Brassinosteroid-Insensitive1* (*TaBR1*) interacts with members of *TaSERK* gene family and cause early flowering and seed yield enhancement in *Arabidopsis*. PLoS ONE 11(6): e0153273. doi:10.1371/journal.pone.0153273
  41. Wang Y, Xu H, Zhang G, Zhu H, Zhang L, Zhang Z, Zhang C, Ma Z (2009) Expression and responses to dehydration and salinity stresses of V-PPase gene members in wheat. J Genet Genomics 36:711-720. doi: 10.1016/S1673-8527(08)60164-2
  42. Milner MJ, Howells RM, Craze M, Bowden S, Graham N, Wallington EJ (2018) A PSTOL-like gene, *TaPSTOL*, controls a number of agronomically important traits in wheat. BMC Plant Biol 18:115. doi: 10.1186/s12870-018-1331-4
  43. Liu G, Li X, Jin S, Liu X, Zhu L, Nie Y, Zhang X (2014) Overexpression of rice NAC gene *SNAC1* improves drought and salt tolerance by enhancing root development and reducing transpiration rate in transgenic cotton. PLoS One 9:e86895. doi: 10.1371/journal.pone.0086895
  44. Chen H, Ma B, Zhou Y, He SJ, Tang SY, Lu X, Xie Q, Chen SY, Zhang JS (2018) E3 ubiquitin ligase SOR1 regulates ethylene response in rice root by modulating stability of Aux/IAA protein. Proc Natl Acad Sci USA 115:4513-4518. doi: 10.1073/pnas.1719387115
  45. von Behrens I, Komatsu M, Zhang Y, Berendzen KW, Niu X, Sakai H, Taramino G, Hochholdinger F (2011) *Rootless with undetectable meristem 1* encodes a monocot-specific AUX/IAA protein that controls embryonic seminal and post-embryonic lateral root initiation in maize. Plant J 66:341-353. doi: 10.1111/j.1365-3113.2011.04495.x
  46. Xu M, Zhu L, Shou H, Wu P (2005) A *PIN1* family gene, *OsPIN1*, involved in auxin-dependent adventitious root emergence and tillering in rice. Plant Cell Physiol 46:1674-1681. doi: 10.1093/pcp/pci183
  47. Zhao Y, Hu Y, Dai M, Huang L, Zhou DX (2009) The WUSCHEL-related homeobox gene *WOX11* is required to activate shoot-borne crown root development in rice. Plant Cell 21:736-748. doi: 10.1105/tpc.108.061655
  48. Jiang H, Wang S, Dang L, Wang S, Chen H, Wu Y, Jiang X, Wu P (2005) A novel short-root gene encodes a glucosamine-6-phosphate acetyltransferase required for maintaining normal root cell shape in rice. Plant Physiol 138:232-242. doi: 10.1104/pp.104.058248
  49. Jia L, Wu Z, Hao X, Carrie C, Zheng L, Whelan J, Wu Y, Wang S, Wu P, Mao C (2011) Identification of a novel mitochondrial protein, short postembryonic roots 1 (SPR1), involved in root development and iron homeostasis in *Oryza sativa*. New Phytol 189:843-855. doi: 10.1111/j.1469-8137.2010.03513.x
  50. Woo YM, Park HJ, Su'udi M, Yang JI, Park JJ, Back K, Park YM, An G (2007) Constitutively wilted 1, a member of the rice YUCCA gene family, is required for maintaining water homeostasis and an appropriate root to shoot ratio. Plant Mol Biol 65:125-136. doi: 10.1007/s11103-007-9203-6

51. Kaur R, Singh K, Singh J (2013) A root-specific wall-associated kinase gene, *HvWAK1*, regulates root growth and is highly divergent in barley and other cereals. *Funct Integr Genomics* 13:167-177. doi: 10.1007/s10142-013-0310-y
52. Hou J, Zheng X, Ren R, Shi Q, Xiao H, Chen Z, Yue M, Wu Y, Hou H, Li L (2022) The histone deacetylase 1/GSK3/SHAGGY-like kinase 2/BRASSINAZOLE-RESISTANT 1 module controls lateral root formation in rice. *Plant Physiol* 189:858-873. doi: 10.1093/plphys/kiac015
53. Zhu J, Li Y, Lin J, Wu Y, Guo H, Shao Y, Wang F, Wang X, Mo X, Zheng S, Yu H, Mao C (2019) CRD1, an Xpo1 domain protein, regulates miRNA accumulation and crown root development in rice. *Plant J* 100:328-342. doi: 10.1111/tpj.14445
54. Fusi R, Rosignoli S, Lou H, Sangiorgi G, Bovina R, Pattem JK, Borkar AN, Lombardi M, Forestan C, Milner SG, Davis JL, Lale A, Kirschner GK, Swarup R, Tassinari A, Pandey BK, York LM, Atkinson BS, Sturrock CJ, Mooney SJ, Hochholdinger F, Tucker MR, Himmelbach A, Stein N, Mascher M, Nagel KA, De Gara L, Simmonds J, Uauy C, Tuberosa R, Lynch JP, Yakubov GE, Bennett MJ, Bhosale R, Salvi S (2022) Root angle is controlled by *EGT1* in cereal crops employing an antigravitropic mechanism. *Proc Natl Acad Sci USA* 119:e2201350119. doi: 10.1073/pnas.2201350119
55. Zhu ZX, Liu Y, Liu SJ, Mao CZ, Wu YR, Wu P (2012) A gain-of-function mutation in *OsIAA11* affects lateral root development in rice. *Mol Plant* 5:154-161. doi: 10.1093/mp/ssr074
56. Kitomi Y, Inahashi H, Takehisa H, Sato Y, Inukai Y (2012) *OsIAA13*-mediated auxin signaling is involved in lateral root initiation in rice. *Plant Sci* 190:116-122. doi: 10.1016/j.plantsci.2012.04.005
57. Luo S, Li Q, Liu S, Pinas NM, Tian H, Wang S (2015) Constitutive Expression of *OsIAA9* affects starch granules accumulation and root gravitropic response in *Arabidopsis*. *Frontiers of Plant Sciences* 6:1156. doi: 10.3389/fpls.2015.01156
58. Nakamura A, Umemura I, Gomi K, Hasegawa Y, Kitano H, Sazuka T, Matsuoka M (2006) Production and characterization of auxin-insensitive rice by overexpression of a mutagenized rice IAA protein. *Plant J* 46:297-306. doi: 10.1111/j.1365-313X.2006.02693.x
59. Wang L, Guo M, Li Y, Ruan W, Mo X, Wu Z, Sturrock CJ, Yu H, Lu C, Peng J, Mao C (2018) *LARGE ROOT ANGLE1*, encoding *OsPIN2*, is involved in root system architecture in rice. *J Exp Bot* 69:385-397. doi: 10.1093/jxb/erx427
60. Kang B, Zhang Z, Wang L, Zheng L, Mao W, Li M, Wu Y, Wu P, Mo X (2013) *OsCYP2*, a chaperone involved in degradation of auxin-responsive proteins, plays crucial roles in rice lateral root initiation. *Plant J* 74:86-97. doi: 10.1111/tpj.12106
61. Ren W, Zhao L, Liang J, Wang L, Chen L, Li P, Liu Z, Li X, Zhang Z, Li J, He K, Zhao Z, Ali F, Mi G, Yan J, Zhang F, Chen F, Yuan L, Pan Q (2022) Genome-wide dissection of changes in maize root system architecture during modern breeding. *Nat Plants* 8:1408-1422. doi: 10.1038/s41477-022-01274-z
62. Schneider HM, Lor VSN, Hanlon MT, Perkins A, Kaeppler SM, Borkar AN, Bhosale R, Zhang X, Rodriguez J, Bucksch A, Bennett MJ, Brown KM, Lynch JP (2022) Root angle in maize influences nitrogen capture and is regulated by calcineurin B-like protein (CBL)-interacting serine/threonine-protein kinase 15 (*ZmCIPK15*). *Plant Cell Environ* 45:837-853. doi: 10.1111/pce.14135
63. Suzuki M, Sato Y, Wu S, Kang BH, McCarty DR (2015) Conserved functions of the MATE transporter BIG EMBRYO1 in regulation of lateral organ size and initiation rate. *Plant Cell* 27:2288-2300. doi: 10.1105/tpc.15.00290



64. Hochholdinger F, Yu P, Marcon C (2018) Genetic control of root system development in maize. Trends Plant Sci 23:79-88. doi: 10.1016/j.tplants.2017.10.004
65. Li F, Yan D, Gao L, Liu P, Zhao G, Jia J, Ren Z (2022b) *TaIAA15* genes regulate plant architecture in wheat. J Integ Agric 21:1243-1252. doi: 10.1016/S2095-3119(20)63480-3
